# Supplementary material for: Hierarchical polyaromatic hydrocarbons (PAH) with superior sodium storage properties
Source: Royal Society of Chemistry journal article supplement (doi:10.1039/d1ta03101e), 2021-01-01
Supplement: d1ta03101e1.pdf [file d1ta03101e1.pdf]

DOI: 10.1002/ ((please add manuscript number))

**Article type: Article**

## Supporting information

### **Hierarchical Polyaromatic Hydrocarbons (PAH) with Superior Sodium Storage Properties**

Jie Qu<sup>a,b,c</sup>, Xin-Xin Dai<sup>b</sup>, Jie-Shun Cui<sup>b</sup>, Rou-Xi Chen<sup>b</sup>, Xin Wang<sup>d</sup>, Yen-Hao Lin<sup>e</sup>,

Rafael Verduzco<sup>e</sup>, Hsing-Lin Wang<sup>a,b,c,\*</sup>

*a. Shenzhen Key Laboratory of Solid State Batteries, Southern University of Science and Technology, Shenzhen 518055, China*

*b. Department of Materials Science and Engineering, Southern University of Science and Technology, Shenzhen, 518055, China.*

*c. Guangdong Provincial Key Laboratory of Energy Materials for Electric Power, Southern University of Science and Technology, Shenzhen 518055, China*

*d. Academy for Advanced Interdisciplinary Studies & Department of Physics, Southern University of Science and Technology, Shenzhen, Guangdong, 518055, China*

*e. Department of Chemical and Biomolecular Engineering, Rice University, Houston TX, 77005, United States.*

## Materials Preparation:

The HBC and HBC-OMe samples were synthesized with a multistep solution-chemistry route.<sup>[1]</sup>

### 1. The synthesis of HPB-H

Compounds tris[4-(2-phenylethynyl)phenyl]amine ( $\text{Ph}_3\text{TPA}$ ) and tris(4-((4-tert-butylphenyl)ethynyl)phenyl)amine ( $\text{tBu}_3\text{TPA}$ ) were synthesized by threefold Sonogashira coupling of the triiodo compound tris(4-iodophenyl)amine ( $\text{I}_3\text{TPA}$ ) with phenylacetylene and 4-tert-butylphenylacetylene, respectively.

### 2. The synthesis of HPB-OMe

A mixture of tris[4-(2-phenylethynyl)phenyl]amine ( $\text{Ph}_3\text{TPA}$ ) and 3,4-bis-(4-methoxyphenyl)-2,5-diphenyl-cyclopenta-2,4-dienone (TPCP-OMe) in  $\text{Ph}_2\text{O}$  (35 mL) was purged with  $\text{N}_2$  and heated at reflux for 24 h. The mixture was cooled, MeOH (200 mL) was added, and the resulting solid was separated by filtration. The product was re-precipitated by dichloromethane/MeOH to afford purified **HPB-OMe** as a beige powder (6.70 g, 94%).

### 3. The synthesis of HBCs

The as-synthesized HPBs were then planarized (fusion of benzene rings) by treating with  $\text{FeCl}_3$  in a dichloromethane/nitromethane mixture for 2–3 h to form the corresponding HBCs. After quenched the reaction with methanol, repetitive dissolution and precipitation with dichloromethane/methanol yielded aimed products.

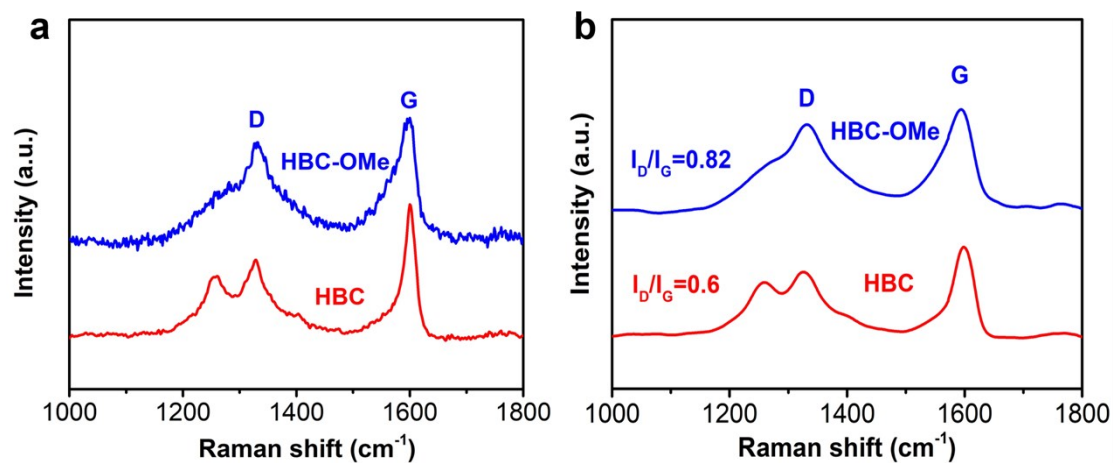

**Figure S1.** Pristine (a) and fitted (b) Raman spectra of HBC and HBC-OMe sample.

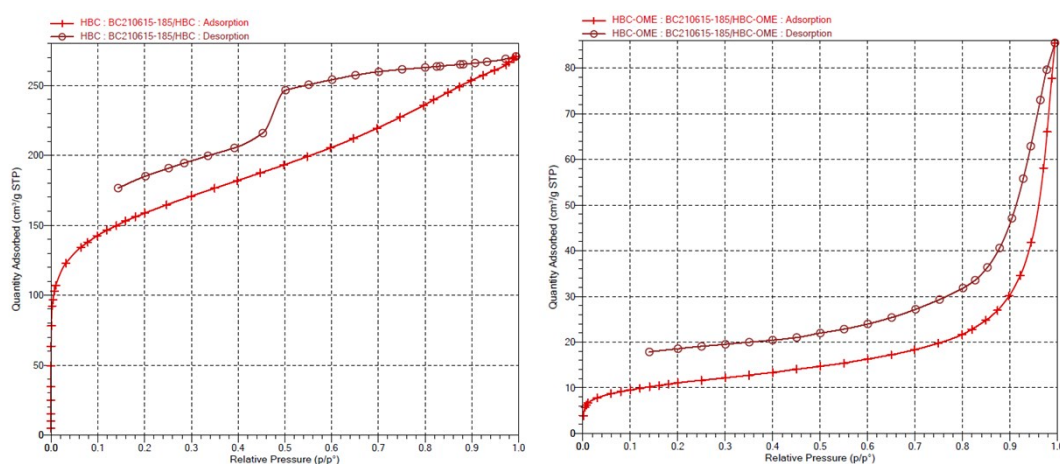

**Figure S2.** N<sub>2</sub> sorption isotherms (at 77 K) for the activated samples of HBC (left) and HBC-OMe (right).

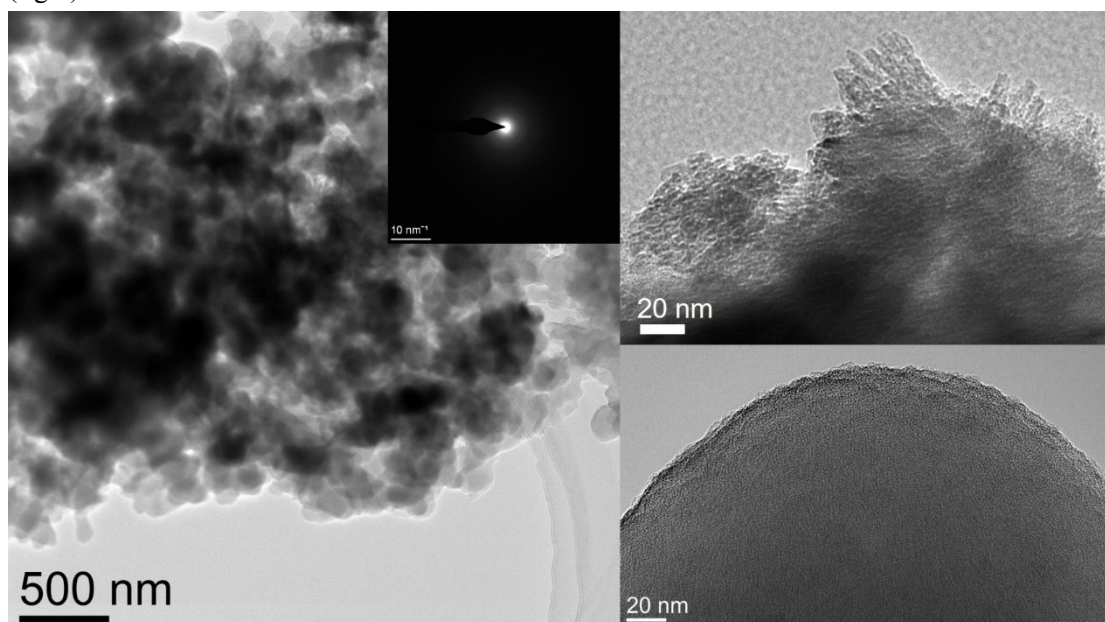

**Figure S3.** HRTEM images of HBC-OMe sample

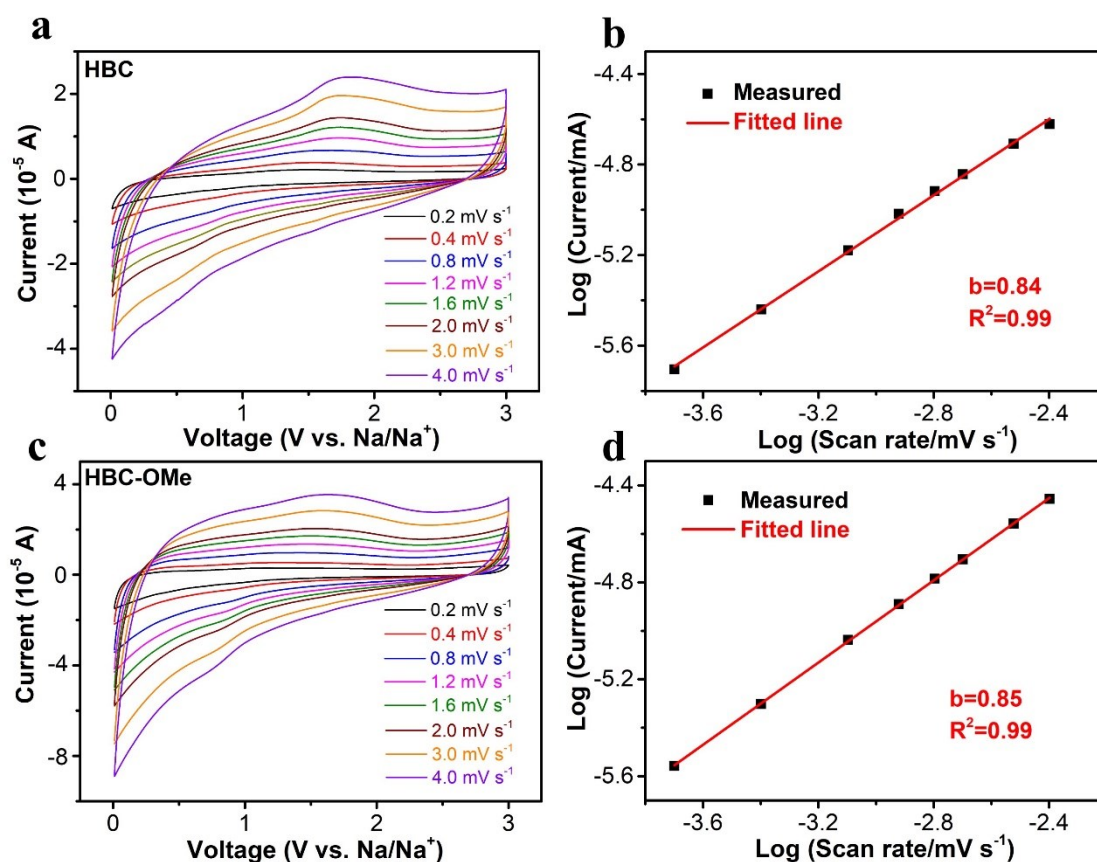

**Figure S4.** CV plots at the scan rate from 0.2 mV s<sup>-1</sup> to 4.0 mV s<sup>-1</sup> (a, c); Linear relationship between the Log (Current) and the Log (Scan rate) for HBC (c) and HBC-OMe (d).

The CV curves at different scan rates are exhibited in Figure S3a and c, which show similar rectangle-shape plots, suggesting analogous electrochemical behavior. According to the power law relationship between scan rate  $\nu$  and current  $i$ , the degree of capacitive effect can be qualitatively analyzed ( $i = a\nu^b$ , where  $a$  and  $b$  are constants,  $b = 0.5$  and  $1.0$  stands for the diffusion-controlled process and capacitive-induced process, respectively). As shown in Figure S3b and d, the  $b$  values for HBC and HBC-OMe electrode are 0.84 and 0.85, respectively, suggesting the capacity contribution is largely originated from the capacitive-dominated process.

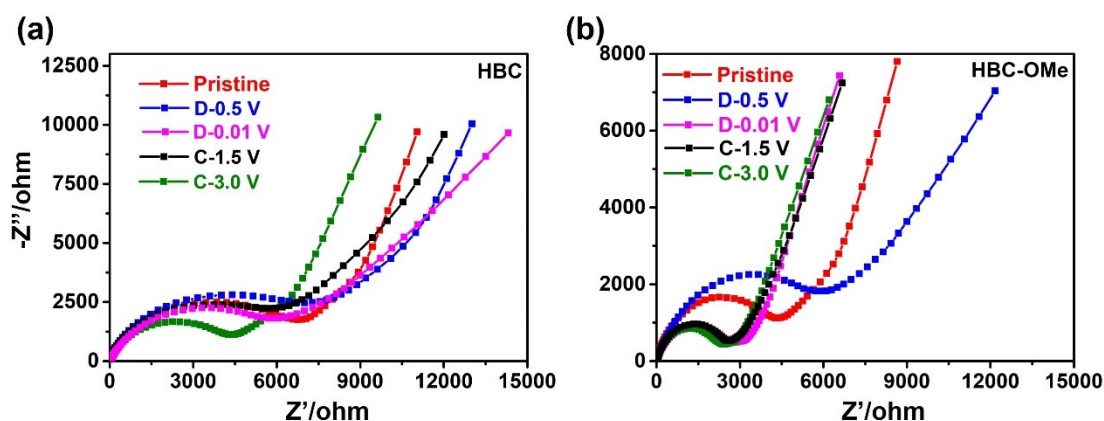

**Figure S5.** EIS analysis of HBC (a) and HBC-OMe (b) for various charging and discharging states.

Electrochemical impedance spectroscopy (EIS) technique was used to investigate the kinetic performances during electrochemical desodiation process. As shown in **Figure S3**, the Nyquist profiles are comprised of two different regions, one is semicircle located in the high-medium frequency range, which is associated to the charge-transfer resistance ( $R_{ct}$ ), and the other straight line in the low frequency region is ascribed to the  $\text{Na}^+$  diffusion in the electrode. As shown in Figure Sa, for HBC electrodes, obviously, compared with the pristine electrode, the diameter of the semicircle increased rapidly when discharged to 0.5 V and slowly decreased when discharged to 0.01 V, indicating the speedy increasing  $R_{ct}$  during discharging process, which could be originated from the SEI film formation and the electrolyte activation, in great accordance with the CV and GDC test results discussed above. The  $R_{ct}$  apparently declined during charging process, which demonstrates that the SEI layer has been gradually stable until the end the first discharging process. The  $R_{ct}$  of HBC-OMe electrodes display similar change trend during different charging and discharging states. Interestingly, when charged to 3.0 V, the  $R_{ct}$  of HBC-OMe electrode is much smaller than that of HBC electrode, implying the faster electrical conductivity, which is closely consistent with rate capability.

**Table S1.** Elemental compositions of the as-prepared sample from the XPS data

| Sample  | C (at.%) | N (at.%) | O (at.%) |
|---------|----------|----------|----------|
| HBC     | 97.92    | 2.08     | 0        |
| HBC-OMe | 82.21    | 1.56     | 16.23    |

**Table S2.** The electrochemical performances comparisons of carbon electrodes in SIBs.

| Materials                                              | Capacity<br>(mAh g <sup>-1</sup> )/current<br>density (A g <sup>-1</sup> ) | Rate performance<br>(mAh g <sup>-1</sup> )/current<br>density (A g <sup>-1</sup> ) | Cycling stability<br>(cycles, current<br>density)         | Ref.         |
|--------------------------------------------------------|----------------------------------------------------------------------------|------------------------------------------------------------------------------------|-----------------------------------------------------------|--------------|
| HBC-OMe                                                | 506 / 0.1                                                                  | 217 / 5<br>161 / 10                                                                | 290 mAh g <sup>-1</sup><br>(1000, 2 A g <sup>-1</sup> )   | This<br>work |
| N-rich graphene                                        | 264.3 / 0.1                                                                | 148 / 5<br>114 / 10                                                                | 210 mAh g <sup>-1</sup><br>(2000, 0.5 A g <sup>-1</sup> ) | [2]          |
| N-doped graphene                                       | 494 / 0.1                                                                  | 262 / 2                                                                            | 189 mAh g <sup>-1</sup><br>(500, 0.5 A g <sup>-1</sup> )  | [3]          |
| Graphite<br>microcrystal/<br>graphene composites       | 279 / 0.05                                                                 | 131 / 2                                                                            | 101 mAh g <sup>-1</sup><br>(2000, 2 A g <sup>-1</sup> )   | [4]          |
| Reduced holy<br>graphene oxide                         | 365 / 0.1                                                                  | 131 / 10                                                                           | 163 mAh g <sup>-1</sup><br>(3000, 2 A g <sup>-1</sup> )   | [5]          |
| Holey graphene<br>nanosheets                           | 220 / 0.03                                                                 | 85 / 10                                                                            | 186 mAh g <sup>-1</sup><br>(500, 0.1 A g <sup>-1</sup> )  | [6]          |
| S-Doped graphene                                       | 436 / 0.05                                                                 | 217 / 3.2                                                                          | 250 mAh g <sup>-1</sup><br>(1000, 2 A g <sup>-1</sup> )   | [7]          |
| Flexible hard carbon                                   | 372 / 0.03                                                                 | 256 / 0.1                                                                          | 180 mAh g <sup>-1</sup><br>(500, 0.2 A g <sup>-1</sup> )  | [8]          |
| Carbon quantum<br>dots                                 | 290 / 0.2                                                                  | 130 / 5<br>104 / 10                                                                | 188 mAh g <sup>-1</sup><br>(500, 2.5 A g <sup>-1</sup> )  | [9]          |
| Hard carbon                                            | 186 / 0.25                                                                 | 86 / 2.5                                                                           | \                                                         | [10]         |
| P-doped hard carbon                                    | 346 / 0.02                                                                 | 67 / 1                                                                             | 290 mAh g <sup>-1</sup><br>(150, 0.04 A g <sup>-1</sup> ) | [11]         |
| P-doped hard carbon<br>nanofibers                      | 287 / 0.05                                                                 | 103 / 2                                                                            | 253 mAh g <sup>-1</sup><br>(200, 0.05 A g <sup>-1</sup> ) | [12]         |
| Expanded graphite                                      | 284 / 0.02                                                                 | 91 / 0.2                                                                           | 150 mAh g <sup>-1</sup><br>(2000, 0.1 A g <sup>-1</sup> ) | [13]         |
| Edge-nitrogen-rich<br>carbon dots pillared<br>graphene | 348 / 0.1                                                                  | 118 / 10                                                                           | 253 mAh g <sup>-1</sup><br>(3000, 0.3 A g <sup>-1</sup> ) | [14]         |

## Reference

- [1] M. G. Schwab, A. Narita, Y. Hernandez, T. Balandina, K. S. Mali, S. De Feyter, X. Feng, K. Müllen, *J. Am. Chem. Soc.* **2012**, *134*, 18169.
- [2] J. L. Liu, Y. Q. Zhang, L. Zhang, F. X. Xie, A. Vasileff, S. Z. Qiao, *Adv. Mater.* **2019**, *31*, 1901261.
- [3] Y. Yang, Z. Z. Pan, Y. Y. Wang, Y. C. Ma, C. L. Y. J. Lu, X. L. Wu, *Nanoscale*. **2019**, *11*, 14616.
- [4] M. M. Kang, H. Q. Zhao, J. Q. Ye, W. Song, H. T. Shen, J. Mi, Z. Li, *J. Mater. Chem. A*. **2019**, *7*, 7565.
- [5] J. Zhao, Y. Z. Zhang, F. Zhang, H. F. Liang, F. W. Ming, H. N. Alshareef, Z. Q. Ga, *Adv. Energy Mater.* **2019**, *9*, 1803215.
- [6] X. F. Luo, C. H. Yang, J. K. Chang, *J. Mater. Chem. A*, **2015**, *3*, 17282.
- [7] B. Quan, A. Jin, S. H. Yu, S. K. Kang, J. Jeong, H. D. Abruna, L. Y. Jin, Y. Z. Piao, Y. E. Sung, *Adv. Sci.* **2018**, *5*, 1700880.
- [8] N. Sun, Y. B. Guan, Y. T. Liu, Q. Z. Zhu, J. R. Shen, H. Liu, S. Q. Zhou, B. Xu, *Carbon*. **2018**, *137*, 475.
- [9] H. S. Hou, C. E. Banks, M. J. Jing, Y. Zhang, X. B. Ji, *Adv. Mater.* **2015**, *27*, 7861.
- [10] Z. F. Li, Z. L. Jian, X. F. Wang, I. A. Rodri'guez-Pe'rez, *Chem. Commun.* 2017, *53*, 2610.
- [11] Z. Li, L. Ma, T. W. Surta, C. Bommier, Z. Jian, Z. Xing, W. F. Stickle, M. Dolgos, K. Amine, J. Lu, T. Wu, X. Ji, *ACS Energy Lett.* **2016**, *1*, 395.
- [12] F. Wu, R. Dong, Y. Bai, Y. Li, G. Chen, Z. Wang, C. Wu, *ACS Appl. Mater. Interfaces*. **2018**, *10*, 21335.
- [13] Y. Wen, K. He, Y. Zhu, F. Han, Y. Xu, I. Matsuda, Y. Ishii, J. Cumings, C. Wang, *Nat. Commun.* **2014**, *5*, 4033.
- [14] Z. Liu, L. Zhang, L. Sheng, Q. Zhou, T. Wei, J. Feng, Z. Fan, *Adv. Energy Mater.* **2018**, *8*, 1802042.
